# Supplementary material for: DDA1 promotes stage IIB–IIC colon cancer progression by activating NFκB/CSN2/GSK-3β signaling
Source: PubMed Central journal article supplement (PMC4991419; doi:10.18632/oncotarget.7847), 2016-03-02
Supplement: oncotarget-07-19794-s001.pdf [file oncotarget-07-19794-s001.pdf]

# DDA1 promotes stage IIB–IIC colon cancer progression by activating NFκB/CSN2/GSK-3β signaling

## Supplementary Materials

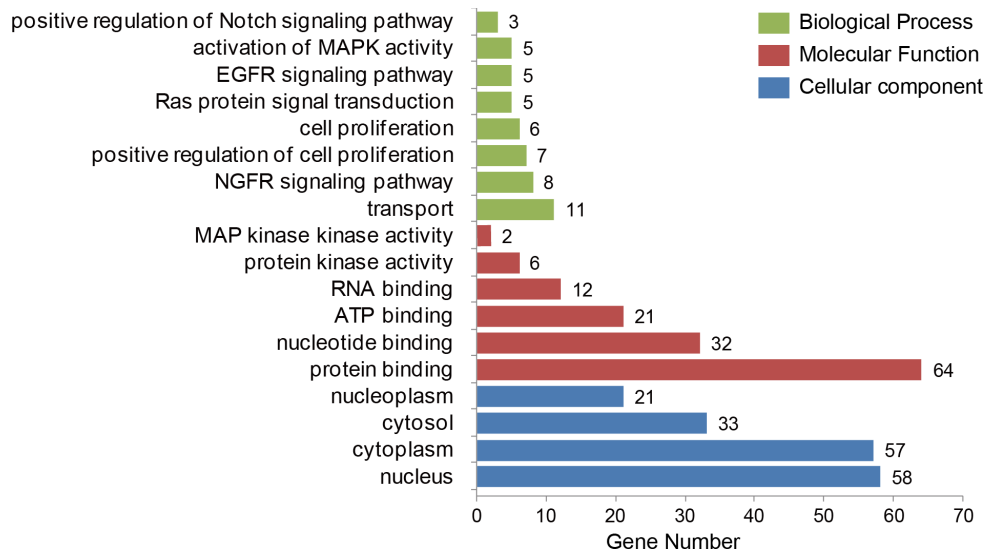

Supplementary Figure S1: DDA1.coexpression.gene.GO annotation GeneCodis.

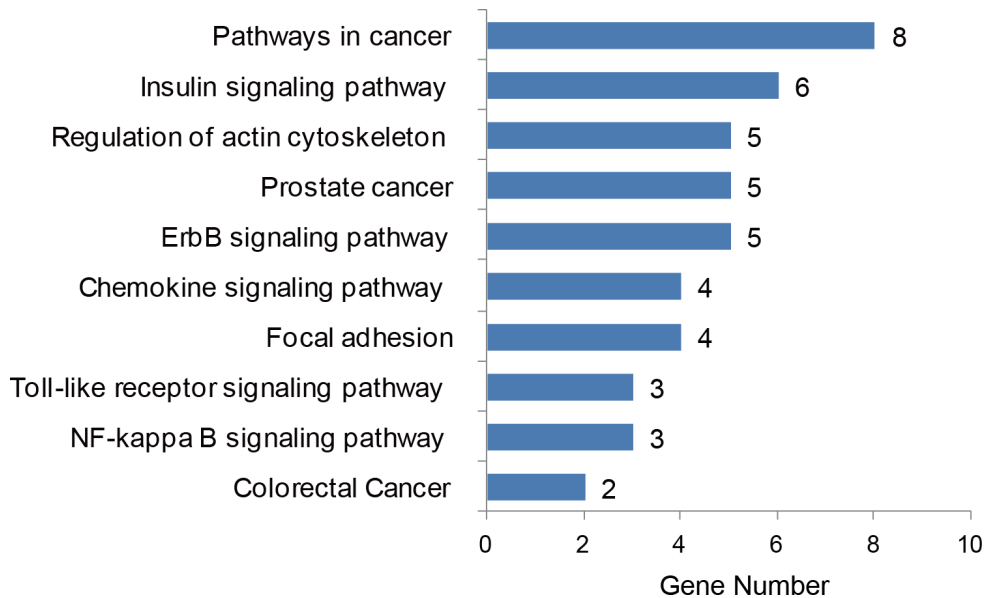

Supplementary Figure S2: DDA1.coexpression.gene.KEGG.GeneCodis.

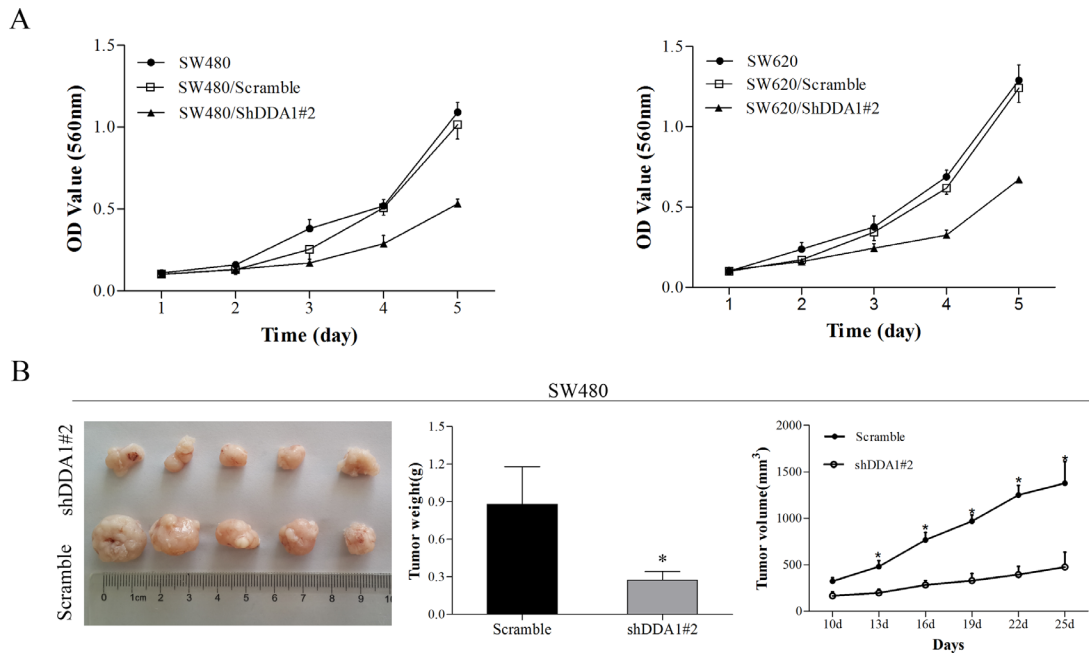

**Supplementary Figure S3: DDA1 knockdown by transfecting with shDDA1#2 inhibited the proliferation of colon cancer cells *in vitro* and *in vivo*.** (A) DDA1 knockdown with shDDA1#2 inhibited SW480 and SW620 cell proliferation *in vitro*, as compared with controls. (B) DDA1 knockdown in SW480 cells prohibited xenografted tumor growth in nude mice, compared with the scramble group. Tumor weight and volume growth curves are shown at three weeks post-injection ( $n = 5$ ,  $*P < 0.05$ )

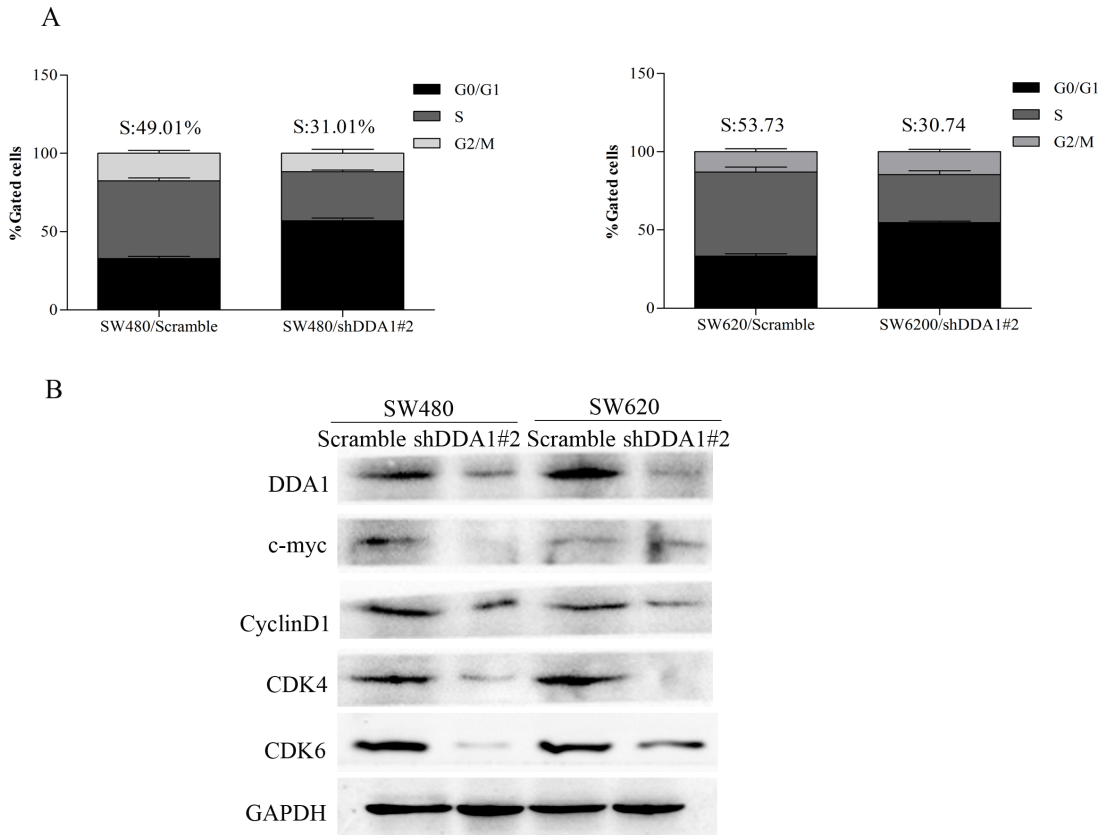

**Supplementary Figure S4: DDA1 knockdown prohibited the cell cycle G0/G1 to S-phase transition.** (A) FACS analyses of cells in every phase of cell cycle after transfection with shDDA1#2 in SW480 and SW620 cell lines; knockdown inhibited cell cycle S-phase arrest ( $*P < 0.05$ ). (B) Western blotting shows cell cycle-related proteins in DDA1 knockdown cell lines.

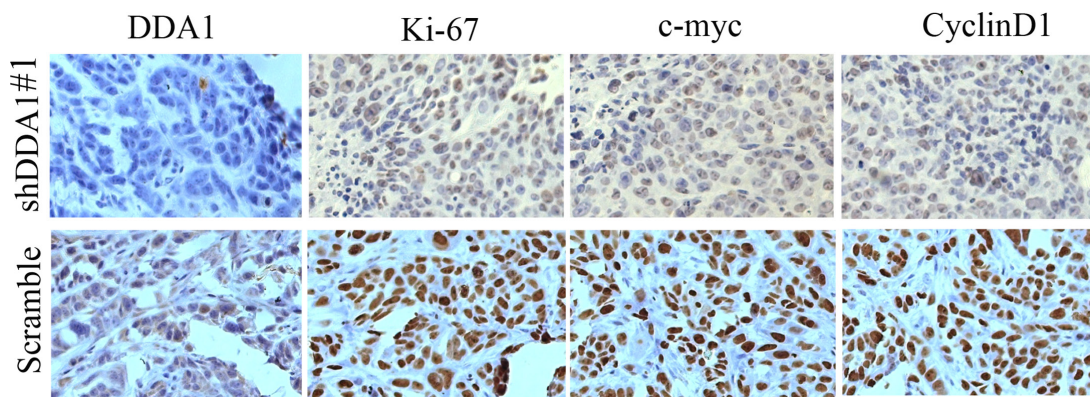

**Supplementary Figure S5: IHC staining of DDA1 and cell cycle-associated markers in DDA1 knockdown xenografts and controls.** DDA1 knockdown in SW480 cells inhibited Ki-67, c-myc, and CyclinD1 expression in xenografts as compared with the control group ( $n = 5$ , magnification  $\times 200$ ).

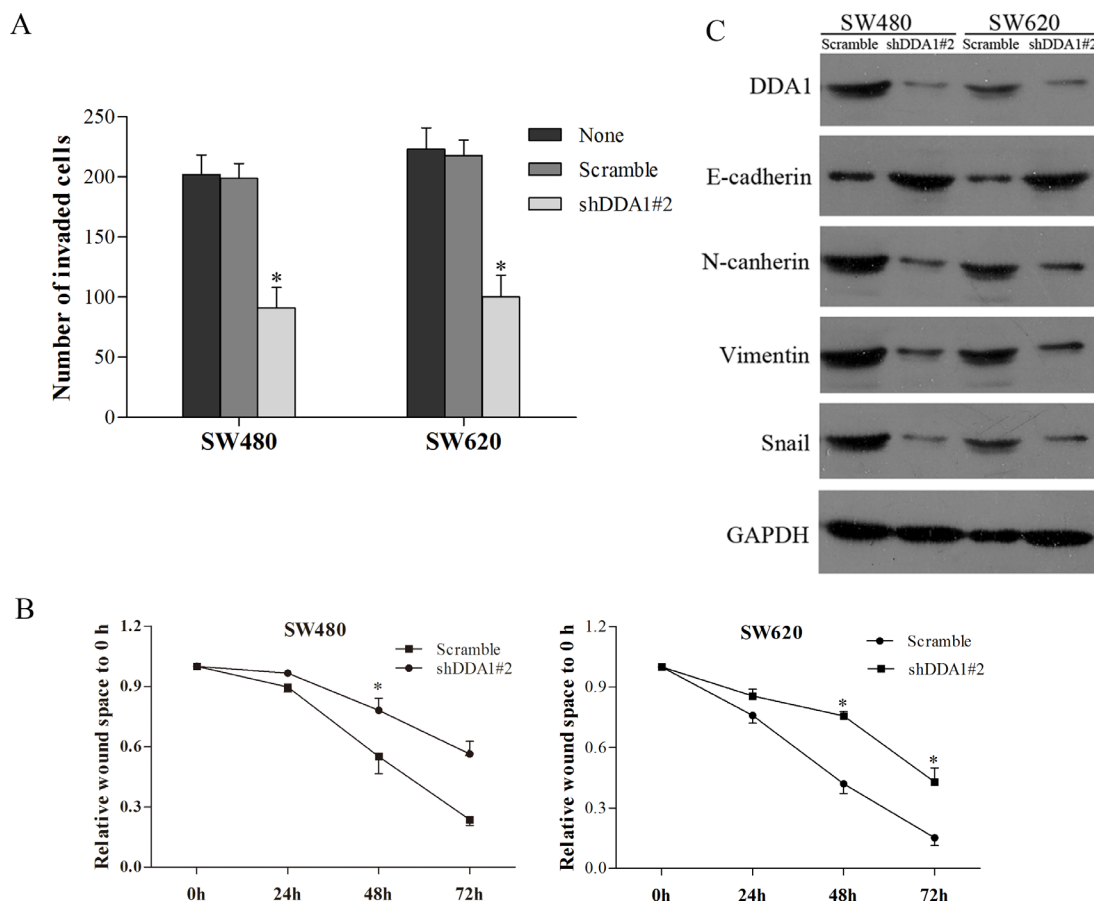

**Supplementary Figure S6: DDA1 knockdown prohibited invasion and reversed the EMT in colon cancer cells.** (A) Invasion assays showed that DDA1 knockdown in SW480 and SW620 cells inhibited cell invasion ( $*P < 0.05$ ). (B) Wound healing assays showed wound closure was delayed in SW480/shDDA1#2 and SW620/shDDA1#2 cells compared with the scramble groups ( $*P < 0.05$ ). (C) EMT marker protein expression in SW480/DDA1 shRNA#2, and SW620/DDA1 shRNA#2 cells.

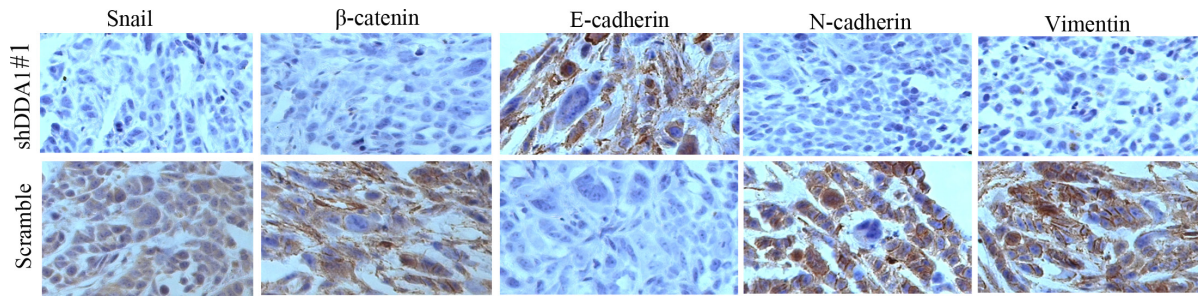

**Supplementary Figure S7: IHC staining of DDA1 and EMT-associated markers in xenografts.** DDA1 knockdown decreased Snail,  $\beta$ -catenin, N-cadherin, and vimentin expression in subcutaneous xenografted tumors of nude mice, and increased E-cadherin expression ( $n = 5$ , magnification  $\times 200$ ).

A

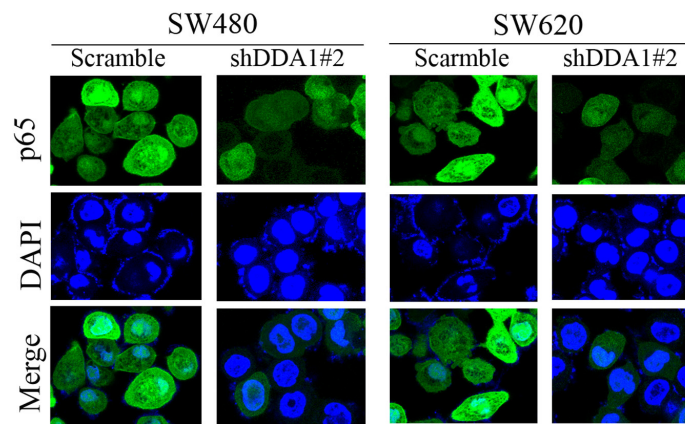

B

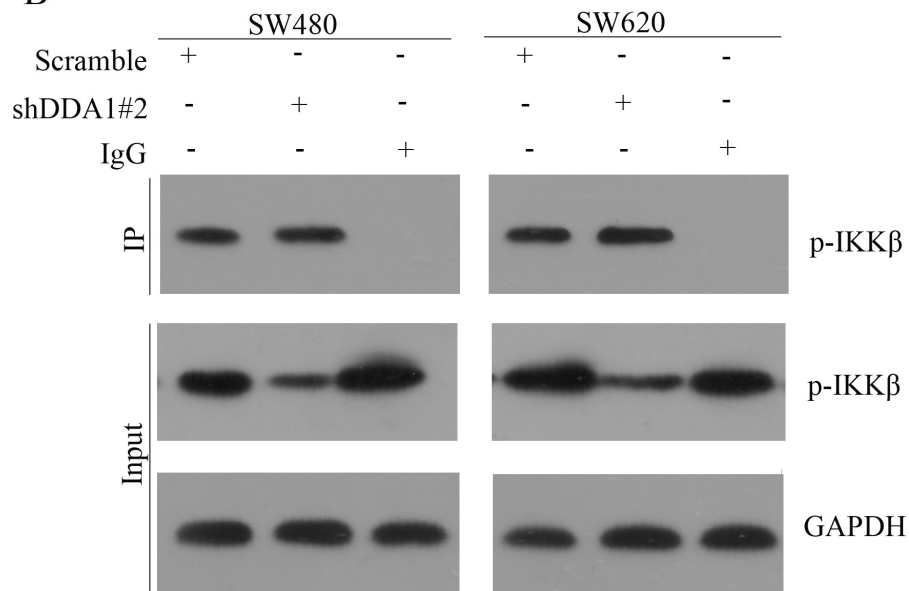

**Supplementary Figure S8: DDA1 knockdown inhibited NF $\kappa$ B activation.** (A) Immunofluorescence analyses showed p65 nuclear translocation decreased in SW480/shDDA1#2 and SW620/shDDA1#2 cells as compared with the Scramble group. (B) Co-immunoprecipitation of endogenous DDA1 and p-IKK $\beta$  in SW480/shDDA1#2, SW620/shDDA1#2 cells and their compared group. After using anti-DDA1 antibody as bait, p-IKK $\beta$  was detected in the immunoprecipitate.

**Supplementary Table S1: Clinicopathologic characteristics of 279 stage II colon cancer patients**

| Characteristics | No. of patients (%) | Relapse                  |                           |
|-----------------|---------------------|--------------------------|---------------------------|
|                 |                     | No<br><i>n</i> = 178 (%) | Yes<br><i>n</i> = 101 (%) |
| Age             |                     |                          |                           |
| < 65            | 127 (45.5)          | 80 (44.9)                | 47 (46.5)                 |
| ≥ 65            | 152 (54.5)          | 98 (55.1)                | 54 (53.5)                 |
| Gender          |                     |                          |                           |
| Female          | 136 (48.7)          | 82 (46.1)                | 54 (53.5)                 |
| Male            | 143 (51.3)          | 96 (53.9)                | 47 (46.5)                 |
| Location        |                     |                          |                           |
| Right           | 95 (34.0)           | 56 (31.5)                | 39 (38.6)                 |
| Transverse      | 20 (7.2)            | 15 (8.4)                 | 5 (5.0)                   |
| Left            | 164 (58.8)          | 107 (60.1)               | 57 (56.4)                 |
| p T stage       |                     |                          |                           |
| pT3             | 117 (41.9)          | 95 (54.4)                | 22 (21.8)                 |
| pT4a            | 95 (34.1)           | 55 (30.9)                | 40 (39.6)                 |
| pT4b            | 67 (24.0)           | 28 (15.7)                | 39 (38.6)                 |
| AJCC stage      |                     |                          |                           |
| IIA             | 117 (41.9)          | 95 (54.4)                | 22 (21.8)                 |
| IIB             | 95 (34.1)           | 55 (30.9)                | 40 (39.6)                 |
| IIC             | 67 (24.0)           | 28 (15.7)                | 39 (38.6)                 |
| Vessel invasion |                     |                          |                           |
| No              | 257 (92.1)          | 170 (95.5)               | 87 (86.1)                 |
| Yes             | 22 (7.9)            | 8 (4.5)                  | 14 (13.9)                 |
| Differentiation |                     |                          |                           |
| Well            | 78 (28.0)           | 58 (32.6)                | 20 (19.8)                 |
| Moderate        | 117 (41.9)          | 77 (43.3)                | 40 (39.6)                 |
| Poor            | 84 (30.1)           | 43 (24.1)                | 41 (40.6)                 |
| Chemotherapy    |                     |                          |                           |
| 5-FU/LV         | 113 (40.5)          | 74 (41.6)                | 39 (38.6)                 |
| FOLFOX4         | 166 (59.5)          | 104 (58.4)               | 62 (61.4)                 |

AJCC, American Joint Committee on Cancer; 5-FU, 5-fluorouracil; LV, leucovorin; FOLFOX4, 5-fluorouracil/5-fluorouracil/leucovorin/oxaliplatin.

**Supplementary Table S2: Postoperative 5-FU-based adjuvant chemotherapy plans for patients with stage II colon cancer**

| Regimens                   | Dose                  | Administration  | Time for drug | Interval cycles | Cycles           |
|----------------------------|-----------------------|-----------------|---------------|-----------------|------------------|
| <b>Mayo Clinic regimen</b> |                       |                 |               |                 |                  |
| LV                         | 500 mg/m <sup>2</sup> | i.v. (2 h Inf)  | Day 1         | Every 8weeks    | Four-week cycles |
| 5-Fu                       | 500 mg/m <sup>2</sup> | i.v.after LV1 h | Day 1         |                 |                  |
| <b>FOLFOX4 regimen</b>     |                       |                 |               |                 |                  |
| 5-Fu                       | 400 mg/m <sup>2</sup> | i.v. (bolus)    | Day 1 + 2     | Every 2 weeks   | Six-week cycles  |
| 5-Fu                       | 600 mg/m <sup>2</sup> | i.v. (22 h Inf) | Day 1 + 2     |                 |                  |
| LV                         | 200 mg/m <sup>2</sup> | i.v. (2 h Inf)  | Day 1 + 2     |                 |                  |
| Oxaliplatin                | 85 mg/m <sup>2</sup>  | i.v. (2 h Inf)  | Day 1         |                 |                  |

5-Fu: 5-fluorouracil; i.v.: intravenous; LV, Leucovorin.

**Supplementary Table S3: Interference sequences used in this study**

| Name              | Sequence                |
|-------------------|-------------------------|
| shDDA1#1          | CGGACTGCCTGTCTACAACAAA  |
| shDDA1#2          | AGCCCTCAGTCTACCTGCCTACT |
| IKK $\beta$ siRNA | TGATGAATCTCCTCCGAAA     |

**Supplementary Table S4: Primer sequences used for qPCR in this study**

| Gene name (Human) | Primer sequence (5'-3') |                        |
|-------------------|-------------------------|------------------------|
|                   | Forward                 | Reverse                |
| DDA1              | TTTAGTCGATTTACGCGGAC    | ATCTGTTTCAGACGGGTACTCG |
| P65               | ATGGGCAAGTCAGCTTCCAAA   | GCCTCAGAATACTGTTGAGCCT |
| GAPDH             | TGTGGGCATCAATGGATTTGG   | ACACCATGTATTCCGGGTCAAT |
| LaminB            | AGGAACCCGAGTTCAGCTAC    | CACGTCGAGGTCACCGAAAG   |



**Supplementary Table S5: Antibodies applied in this study**

| Antibody                        | WB      | IHC   | IF    | Specificity       | Company                   |
|---------------------------------|---------|-------|-------|-------------------|---------------------------|
| DDA1 (ab189975)                 | 1:1000  | 1:400 | –     | Rabbit polyclonal | Abcam                     |
| CyclinD1 (sc-246)               | 1:500   | 1:100 | –     | Mouse monoclonal  | Santa Cruz Biotechnology  |
| C-myc (BS2462)                  | 1:500   | 1:200 | –     | Rabbit polyclonal | Biowold                   |
| CDK4 (sc-260)                   | 1:500   | –     | –     | Rabbit polyclonal | Santa Cruz Biotechnology  |
| CDK6 (sc-7961)                  | 1:500   | –     | –     | Mouse monoclonal  | Santa Cruz Biotechnology  |
| Ki-67 (#12202)                  | –       | 1:100 | –     | Mouse monoclonal  | Cell Signaling Technology |
| P65 (#8242)                     | –       | 1:800 | 1:400 | Rabbit monoclonal | Cell Signaling Technology |
| $\beta$ -catenin (#8480)        | 1:1000  | 1:200 | –     | Rabbit monoclonal | Cell Signaling Technology |
| E-cadherin (sc-21791)           | 1:500   | 1:100 | –     | Mouse monoclonal  | Santa Cruz Biotechnology  |
| N-cadherin (ab18203)            | 1:1000  | 1:100 | –     | Rabbit polyclonal | Abcam                     |
| Vimentin (sc-53464)             | 1:500   | 1:100 | –     | Mouse monoclonal  | Santa Cruz Biotechnology  |
| Snail1 (BS1853)                 | 1:500   | 1:200 | –     | Rabbit polyclonal | Bioworld                  |
| p-I $\kappa$ B $\alpha$ (#9246) | 1:1000  | –     | –     | Mouse Monoclonal  | Cell Signaling Technology |
| I $\kappa$ B $\alpha$ (#4812)   | 1:1000  | –     | –     | Rabbit Monoclonal | Cell Signaling Technology |
| p-GSK3 $\beta$ (BS4084)         | 1:500   | –     | –     | Rabbit polyclonal | Bioworld                  |
| GSK3 $\beta$ (BS1402)           | 1:500   | –     | –     | Rabbit monoclonal | Bioworld                  |
| GAPDH (ab181602)                | 1:10000 | –     | –     | Rabbit monoclonal | Abcam                     |
| Caspase 3 (#9665)               | 1:1000  | –     | –     | Rabbit monoclonal | Cell Signaling Technology |
| Cleaved Caspase3 (#9664)        | 1:1000  | –     | –     | Rabbit monoclonal | Cell Signaling Technology |
| PARP (ab6079)                   | 1:400   | –     | –     | Rabbit polyclonal | Abcam                     |
